# Supplementary material for: Coping with Digital Extortion: An Experimental Study of Benefit Appeals and Normative Appeals
Source: Atypon-hosted journal article supplement (doi:10.1287/mnsc.2021.4154), 2021-11-22
Supplement: mnsc.2021.4154.sm1.zip [file Experiment Screenshots.pdf › data and code/Laboratory Experiments/Experiment Screenshots.pdf]

## **MTurk Experiment instruction and quiz**

### **Instruction-Background Information**

This is an experiment in ransomware and protection investment. If you follow the instructions carefully and make good decisions, you may earn a considerable amount of money that will be paid to you in cash at the end of the experiment. You have already earned US\$1 show-up fee for participating. You will earn *experimental dollars* during the experiments, and experimental dollars will be converted to US dollars at the end of the experiment with the following exchange rate.

1,000 experimental dollars = US\$1

You will receive the show up fee (\$1) and any additional earnings ONLY if you finish the experiment.

In this experiment, there are three players: Attacker, Defender 1, and Defender 2. During the experiment, you will be randomly assigned to be the Attacker, the Defender 1, or the Defender 2. You will play the same role for the entire experiment. In total, you are going to play 30 rounds. In the first round, you will be randomly paired up with other players to form a 1 attacker- 2 Defenders group to play the game. You will stay in the same group for the entire experiment.

### **Data Value**

In each round, each Defender is given a “data value” of 100 experimental dollars. The defender will receive these 100 experimental dollars at the end of each period if this data value is not lost.

### **Ransomware Attack**

In each round, the Attacker chooses one of three options: (a) attack Defender 1; (b) attack Defender 2; (c) do not attack. If the Attacker chooses to attack a Defender, he/she also decides a ransom to ask.

The Attacker’s probability of being successful is 80%. A defender can reduce the probability to 30% by spending 30 experimental dollars to make a protection investment.

If the attack is successful, the affected Defender chooses whether to pay the ransom. If the Defender decides to pay, he/she will not lose his/her data value and the Attacker receives the ransom for the round. If the Defender decides NOT to pay the ransom, the Defender loses his/her data value and the Attacker receives nothing for the round.

If the Attacker decides not to attack, the Attacker receives a fixed payment of 40 experimental dollars for the round.

### **Protection Investment**

Protection Investment can reduce the Attacker's probability of being successful from 80% to 30%. That is, if a Defender who made protection investment is attacked, the Attacker's probability of being successful is 30%. If a Defender who did not make protection investment is attacked, the Attacker's probability of being successful is 80%. If a Defender decides to invest, a cost of 30 experimental dollars will occur for the round.

**You will be allowed to continue only if you pass the following quizzes.**

#### **Quiz Question 1**

Pretending the following scenario happened for a particular round in the experiment:

Defender 1 decided not to make the protection investment.

Defender 2 decided to make the protection investment.

Attacker decided not to attack.

What is the experiment dollar payoff for the Defender 1? Answer: 100

What is the experiment dollar payoff for the Attacker? Answer: 40

#### **Quiz Question 2**

Pretending the following scenario happened for a particular round in the experiment:

Defender 1 decided not to make the protection investment.

Defender 2 decided to make the protection investment.

Attacker decided to attack Defender 1 and asked 55 as ransom.

It was a successful attack, and Defender 1 decided to pay the ransom.

What is the experiment dollar payoff for the Defender 1? Answer: 45

What is the experiment dollar payoff for the Attacker? Answer: 55

#### **Quiz Question 3**

Pretending the following scenario happened for a particular round in the experiment:

Defender 1 decided not to make the protection investment.

Defender 2 decided not to make the protection investment.

Attacker decided to attack Defender 2 and asked 60 as ransom.

It was an unsuccessful attack.

What is the experiment dollar payoff for the Defender 2? Answer: 100

What is the experiment dollar payoff for the Attacker? Answer: 0

## Appendix D. SoPHIE Screenshot (Baseline Treatment)

### Defenders make investment decisions

 **SoPHIE**

**You are the Defender 1**

Your data value is: 100  
Protection Investment cost is: 30

Defender 2's data value is: 100  
Defender 2's Protection Investment cost is: 30

If a Defender who did NOT make a protection investment is attacked: the Attacker's probability of being successful is: 80%  
If a Defender who made a protection investment is attacked: the Attacker's probability of being successful is: 30%

**Do you want to make a Protection Investment to reduce the probability of being successfully attacked?**

☐ Not Invest  
☒ Invest

 **SoPHIE**

**You are the Defender 2**

Your data value is: 100  
Protection Investment cost is: 30

Defender 1's data value is: 100  
Defender 1's Protection Investment cost is: 30

If a Defender who did NOT make a protection investment is attacked: the Attacker's probability of being successful is: 80%  
If a Defender who made a protection investment is attacked: the Attacker's probability of being successful is: 30%

**Do you want to make a Protection Investment to reduce the probability of being successfully attacked?**

☐ Not Invest  
☒ Invest

### Attacker waits for defenders

 **SoPHIE**

**You are the Attacker**

You can decide to attack a Defender and ask for a Ransom as your payoff.

Defender 1's data value is: 100  
Defender 1's Protection Investment cost is: 30

Defender 2's data value is: 100  
Defender 2's Protection Investment cost is: 30

Please wait for the Defenders to make their Investment Decisions.

If a Defender who did NOT make a protection investment is attacked: the Attacker's probability of being successful is: 80%  
If a Defender who made a protection investment is attacked: the Attacker's probability of being successful is: 30%

In the next stage:

1. You decide to attack or not to attack.
2. (a) If you decided to attack, you need to choose from attack Defender 1 or 2, and  
2. (b) You need to decide the Ransom amount.

## Attacker makes attack and ransom decisions



**You are the Attacker**

Defender 1's data value is: 100  
Defender 1's Protection Investment cost is: 30  
Defender 1's Investment decision is: Not Invest  
**If you attack Defender 1, the probability of successful attack is: 80%**

Defender 2's data value is: 100  
Defender 2's Protection Investment cost is: 30  
Defender 2's Investment decision is: Invest  
**If you attack Defender 2, the probability of successful attack is: 30%**

**If you decide not to attack, your payoff is 40**

What is your attacking decision?\*

☒ Attack Defender 1  
☐ Attack Defender 2  
☐ Do not attack

If you decided to attack, how much Ransom to ask?\*

## Affected defender makes payment decision



**You are the Defender 1**

Your data value is: 100  
Protection Investment cost is: 30  
Your Investment decision is: Not Invest

Defender 2's data value is: 100  
Defender 2's Protection Investment cost is: 30  
Defender 2's Investment decision is: Not Invest

**Who got attacked: You got attacked**

Attacker successfully attacked you. If you do not pay the ransom, you lose your data value.  
Ransom Amount is: 60

**Do you want to pay the ransom?**

☐ Not Pay  
☒ Pay

## End of a round: show profit



| Results |                     |                     |                   |                |               |              |                   |                   |                 |
|---------|---------------------|---------------------|-------------------|----------------|---------------|--------------|-------------------|-------------------|-----------------|
| Round   | Defender 1 Decision | Defender 2 Decision | Attacker Decision | Attack Outcome | Ransom Amount | Pay Decision | Defender 1 Payoff | Defender 2 Payoff | Attacker Payoff |
| 1       | Not Invested        | Not Invested        | Attacked D1       | Succeeded      | 60            | Paid         | 40                | 100               | 60              |
| 2       | Invested            | Invested            | Not Attacked      | N/A            | N/A           | N/A          | 70                | 70                | 40              |

## Benefit Appeals: Should Invest

## Descriptive Appeals: 73% Invest

Defenders make investment decisions

 **SoPHIE**

**You are the Defender 1**

Your data value is: 100  
Protection Investment cost is: 30

Defender 2's data value is: 100  
Defender 2's Protection Investment cost is: 30

If a Defender who did NOT make a protection investment is attacked: the Attacker's probability of being successful is: 80%  
If a Defender who made a protection investment is attacked: the Attacker's probability of being successful is: 30%

**You should invest to reduce the chance of being successfully attacked.**

Do you want to make a Protection Investment to reduce the probability of being successfully attacked?

☒ Not Invest  
☐ Invest

Submit ...

 **SoPHIE**

**You are the Defender 1**

Your data value is: 100  
Protection Investment cost is: 30

Defender 2's data value is: 100  
Defender 2's Protection Investment cost is: 30

If a Defender who did NOT make a protection investment is attacked: the Attacker's probability of being successful is: 80%  
If a Defender who made a protection investment is attacked: the Attacker's probability of being successful is: 30%

**In a previous session, defenders invested 73% of the time.**

Do you want to make a Protection Investment to reduce the probability of being successfully attacked?

☒ Not Invest  
☐ Invest

Submit ...

## Benefit Appeals: Should Not Pay

## Descriptive Appeals: 62% Not Pay

Affected defender makes payment decision

 **SoPHIE**

**You are the Defender 1**

Your data value is: 100  
Protection Investment cost is: 30  
Your Investment decision is: Not Invest

Defender 2's data value is: 100  
Defender 2's Protection Investment cost is: 30  
Defender 2's Investment decision is: Invest

**Who got attacked: You got attacked**

Attacker successfully attacked you. If you do not pay the ransom, you lose your data value.  
Ransom Amount is: 70

**You should not pay the attacker to discourage him from attacking in the future.**

Do you want to pay the ransom?

☒ Not Pay  
☐ Pay

Submit ...

 **SoPHIE**

**You are the Defender 1**

Your data value is: 100  
Protection Investment cost is: 30  
Your Investment decision is: Not Invest

Defender 2's data value is: 100  
Defender 2's Protection Investment cost is: 30  
Defender 2's Investment decision is: Invest

**Who got attacked: You got attacked**

Attacker successfully attacked you. If you do not pay the ransom, you lose your data value.  
Ransom Amount is: 70

**In a previous session, defenders refused to pay the attacker 62% of the time, if successfully attacked.**

Do you want to pay the ransom?

☒ Not Pay  
☐ Pay

Submit ...
