# Supplementary material for: Coping with Digital Extortion: An Experimental Study of Benefit Appeals and Normative Appeals
Source: Atypon-hosted journal article supplement (doi:10.1287/mnsc.2021.4154), 2021-11-22
Supplement: mnsc.2021.4154.sm1.zip [file Summary for Data Analysis.pdf › data and code/Data and Data Analysis/Summary for Data Analysis.pdf]

## Summary for Data Analysis

1. dataset, refer to “combine data.xlsx”.
2. Data analysis tool: STATA.exe
3. STATA code, refer to “data analysis.do”.
4. Under data analysis.do:
  - Table 3: Summary group average statistic
  - Table 3: Calculate group average statistic SD
  - Table 4-7: group average Mann-Whitney test
  - Table 8: Correlation
  - Table 9: Prior investment effect
