# Supplementary material for: Coping with Digital Extortion: An Experimental Study of Benefit Appeals and Normative Appeals
Source: Atypon-hosted journal article supplement (doi:10.1287/mnsc.2021.4154), 2021-11-22
Supplement: mnsc.2021.4154.sm1.zip [file Summary for laboratory experiments.pdf › data and code/Laboratory Experiments/Summary for laboratory experiments.pdf]

### Summary for Laboratory Experiments

1. The experiments were conducted on MTurk (<https://www.mturk.com/>) via SoPhIE (<https://www.sophielabs.com/>), refer to “SoPhIE Code” folder.
2. Experimental Instructions, main game, questionnaires, refer to “Experiment Screenshots.pdf”.
3. Participant can only attend the experiment once.
4. We restricted our subjects’ web portal geographic location to the United States and only accepted workers with good reputation (completed more than 100 MTurk tasks with at least 95% approval ratings) as our experiment subjects.
